# Supplementary material for: Effect of Reduced Nitrogen Fertilization Recommended by the EC "From Field to Table" Strategy on the Chemical and Biological Traits of Soils under Maize Crops
Source: Preprints.org preprint supplement (doi:10.20944/preprints202307.2000.v1), 2023-07-28
Supplement: Supplementary file 1 [file supplementary]

**Effect of reduced nitrogen fertilization (according to the EC's "Field to Table" strategy) on the chemical and biological traits of soils under maize crops****

*Agnieszka Wolińska1, Artur Banach1*, Anna Kruczyńska1, Anna Sochaczewska1, Weronika Goraj1, Jacek Podlewski2, Andrzej Słomczewski2, and Agnieszka Kuźniar1*

1 Department of Biology and Biotechnology of Microorganisms, The John Paul II Catholic University of Lublin, Konstantynów 1 I Str., 20-708 Lublin, Poland

2 CGFP Sp. z o.o., Wojnowo 5, 86-014 Sicienko, Poland

* Corresponding author e-mail: artur.banach@kul.pl

** Scientific work supported by the state budget (Poland) under the program of the Ministry of Education and Science named "Science for the Society" project number NdS/531260/2021/2021, the amount of funding 100%, the total value of the project 625 910.50 PLN

SUPPLEMENTARY MATERIALS

**Table S1.** The correlation analysis between studied parameters with r-value given with their significance (* - p < 0.05, ** - p < 0.01).

|  | **pH** | **WHC** | **Ca** | **Mg** | **K** | **TC** | **N-NO3** | **N-NH4** | **Olsen P** | **EDC** | **TS** | **AR** | **CKH** |
| --- | --- | --- | --- | --- | --- | --- | --- | --- | --- | --- | --- | --- | --- |
| **PPW** | .591 ** | -- |  |  |  |  |  |  |  |  |  |  |  |
| **Ca** | .725 ** | .662 ** | -- |  |  |  |  |  |  |  |  |  |  |
| **Mg** | .63 6** | .703 ** | .804 ** | -- |  |  |  |  |  |  |  |  |  |
| **K** | .583* * | .616 ** | .614 ** | .774 ** | -- |  |  |  |  |  |  |  |  |
| **TC** | .313 ** | .430 ** | .312 ** | .433 ** | .328 ** | -- |  |  |  |  |  |  |  |
| **N-NO3** | -.596 ** | -.621 ** | -.534 ** | -.532 ** | -.477 ** | -.328 ** | -- |  |  |  |  |  |  |
| **N-NH4** | .644 ** | .639 ** | .561 ** | .575 ** | .542 ** | .512 ** | -.644 ** | -- |  |  |  |  |  |
| **Olsen P** | .434 ** | .615 ** | .416 ** | .506 ** | .55 4** | .374 ** | -.659 ** | .734 ** | -- |  |  |  |  |
| **EDC** | .760 ** | .749 ** | .791 ** | .820 ** | .764 ** | .451 ** | -.686 ** | .735 ** | .694 ** | -- |  |  |  |
| **TS** | .472 ** | .453 ** | .404 ** | .474 ** | .375 ** | .453 ** | -.364 ** | .406 ** | .300 ** | .556 ** | -- |  |  |
| **AR** | .598 ** | .624 ** | .628 ** | .659 ** | .561 ** | .372 ** | -.574 ** | .583 ** | .593 ** | .744 ** | .407 ** | -- |  |
| **CKH** | -.530 ** | -.353 ** | -.493 ** | -.482 ** | -.540 ** | -.009 | .379 ** | -.405 ** | -.374 ** | -.502 ** | -.191 ** | -.334 ** | -- |
| **E4/6** | -.307 ** | -.266 ** | -.318 ** | -.202 ** | -.171 ** | -.106 | .234 ** | -.137 * | -.184 ** | -.287 ** | -.131 * | -.237 ** | .085 |


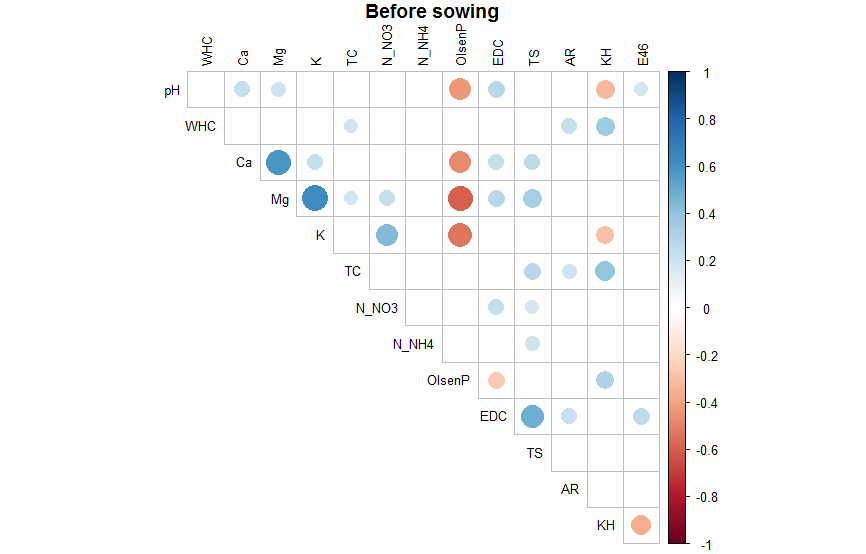


**Figure S1.** Correlogram between studied parameters for data collected before sowing maize.


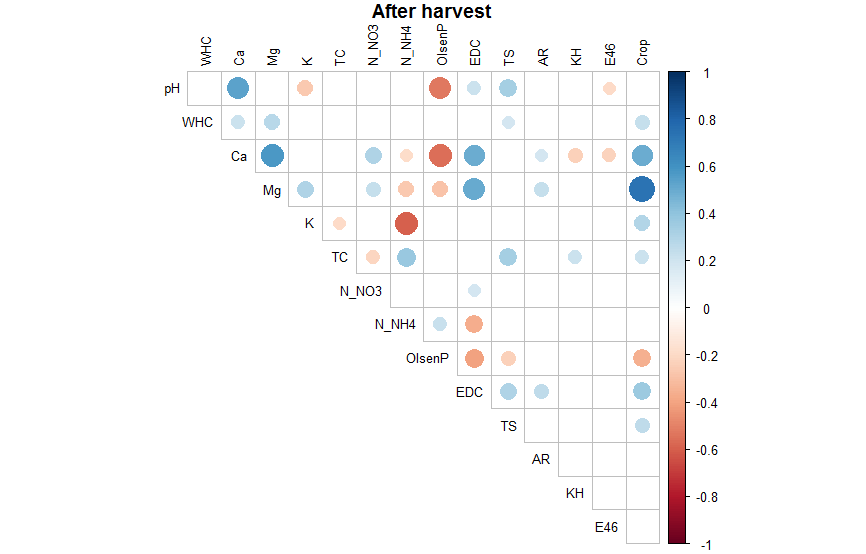


**Figure S2.** Correlogram between studied parameters for data collected after harvesting maize.
